# Supplementary material for: Co-Occurrence of Aflatoxin B1, Zearalenone and Ochratoxin A in Feed and Feed Materials in Central Italy from 2018 to 2022
Source: MDPI journal article supplement (doi:10.3390/foods13020313), 2024-01-18
Supplement: s1 [file s1]

## Supplementary material

**Figure S1.** Overall incidence of feed and feed materials from 2018 to 2022.

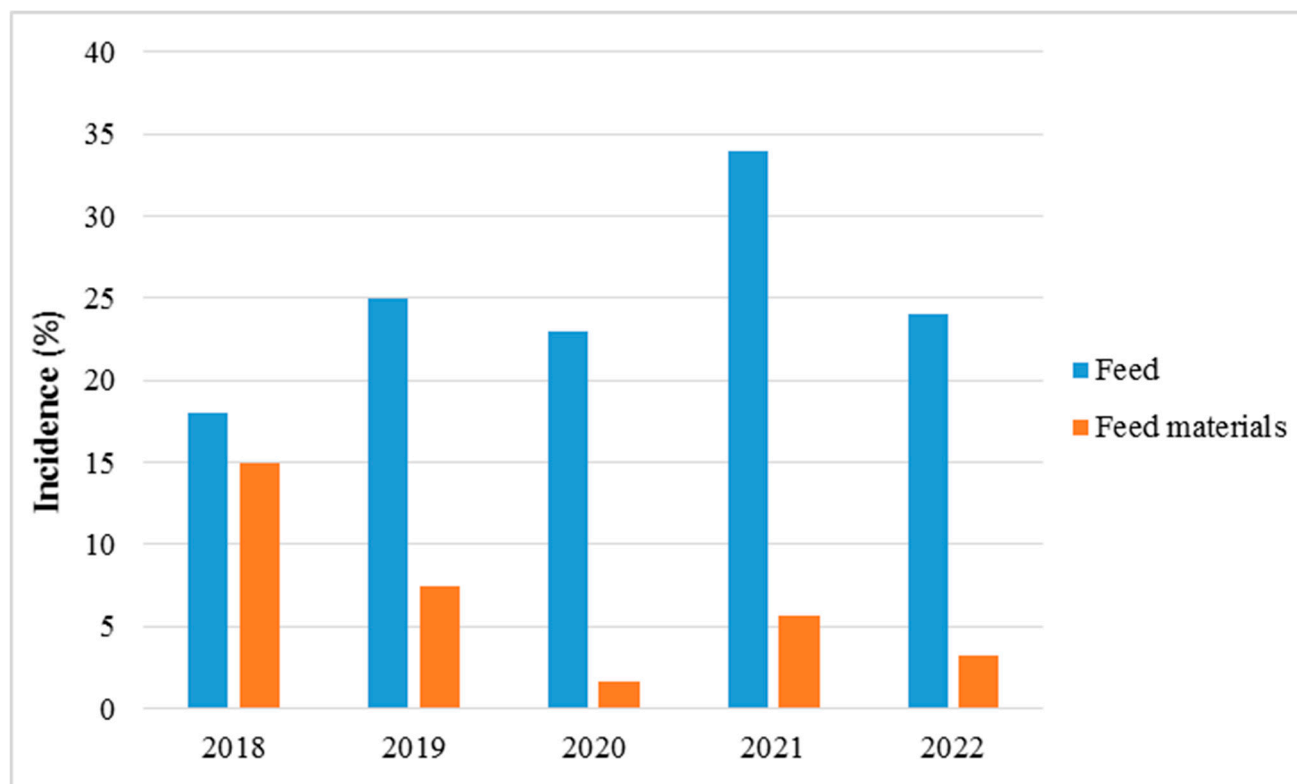

**Table S1.** LC gradient and FLD parameters

| Time                             | MeOH (%)             | ACN (%)             | AcOH (%) | Flow (mL/min) |
|----------------------------------|----------------------|---------------------|----------|---------------|
| 0.00                             | 30                   | 0                   | 70       | 0.6           |
| 3.50                             | 30                   | 0                   | 70       |               |
| 3.60                             | 1                    | 29                  | 70       |               |
| 5.00                             | 1                    | 29                  | 70       |               |
| 6.00                             | 1                    | 29                  | 70       |               |
| 9.60                             | 1                    | 29                  | 70       | 1.0           |
| 11.00                            | 1                    | 29                  | 70       |               |
| 11.10                            | 30                   | 0                   | 70       |               |
| 13.60                            | 30                   | 0                   | 70       |               |
| 15.50                            | 30                   | 0                   | 70       | 0.6           |
| Fluorescence detector parameters |                      |                     |          |               |
|                                  | $\lambda_{exc}$ (nm) | $\lambda_{em}$ (nm) | Gain     | Sensitivity   |
| AFB <sub>1</sub>                 | 364                  | 434                 | x16      | High          |
| ZEN                              | 270                  | 470                 | x4       | High          |
| OTA                              | 334                  | 460                 | x16      | Medium        |

**Table S2.** Linearity of Aflatoxin B<sub>1</sub>, Zearalenone and Ochratoxin A determined with back-calculated concentration (BCC)

| <b>Aflatoxin B<sub>1</sub></b> |             |                    |             |
|--------------------------------|-------------|--------------------|-------------|
| <b>µg/mL</b>                   | <b>Area</b> | <b>BCC (µg/mL)</b> | <b>Δ%</b>   |
| 0                              | 0           |                    |             |
| 0.001                          | 967770      | 0.0010             | <b>0.8</b>  |
| 0.0026                         | 2385680     | 0.0026             | <b>-1.5</b> |
| 0.0051                         | 4742022     | 0.0051             | <b>0.7</b>  |
| 0.0102                         | 9458215     | 0.0103             | <b>1.0</b>  |
| 0.0204                         | 18640660    | 0.0203             | <b>-0.3</b> |
| <b>Slope</b>                   | 913911860   |                    |             |
| <b>Intercept</b>               | 46268       |                    |             |

| <b>Zearalenone</b> |             |                    |             |
|--------------------|-------------|--------------------|-------------|
| <b>µg/mL</b>       | <b>Area</b> | <b>BCC (µg/mL)</b> | <b>Δ%</b>   |
| 0                  | 0           |                    |             |
| 0.0284             | 805717      | 0.0278             | <b>-2.2</b> |
| 0.1136             | 3164323     | 0.1152             | <b>1.4</b>  |
| 0.2841             | 7752185     | 0.2853             | <b>0.4</b>  |
| 0.5682             | 15397862    | 0.5688             | <b>0.1</b>  |
| 1.1363             | 30681720    | 1.1355             | <b>-0.1</b> |
| <b>Slope</b>       | 26969894    |                    |             |
| <b>Intercept</b>   | 56625       |                    |             |

| <b>Ochratoxin A</b> |             |                    |             |
|---------------------|-------------|--------------------|-------------|
| <b>µg/mL</b>        | <b>Area</b> | <b>BCC (µg/mL)</b> | <b>Δ%</b>   |
| 0.0000              | 0           |                    |             |
| 0.0129              | 777581      | 0.0127             | <b>-1.9</b> |
| 0.0322              | 1920707     | 0.0323             | <b>0.2</b>  |
| 0.0643              | 3810293     | 0.0647             | <b>0.6</b>  |
| 0.1286              | 7606621     | 0.1298             | <b>1.0</b>  |
| 0.2573              | 14983463    | 0.2564             | <b>-0.3</b> |
| 0.5145              | 30027207    | 0.5146             | <b>0.0</b>  |
| <b>Slope</b>        | 58275874    |                    |             |
| <b>Intercept</b>    | 39842       |                    |             |

**Table S3.** LODs and LOQs for Aflatoxin B<sub>1</sub>, Zearalenone and Ochratoxin A

| Analyte                  | Theoretical LOD (mg/Kg) | Theoretical LOQ (mg/Kg) | Practical LOQ in feed (mg/Kg) | Practical LOQ in feed materials (mg/Kg) |
|--------------------------|-------------------------|-------------------------|-------------------------------|-----------------------------------------|
| Aflatoxin B <sub>1</sub> | 0.0005                  | 0.0015                  | 0.0020                        | 0.0080                                  |
| Zearalenone              | 0.017                   | 0.051                   | 0.050                         | 0.200                                   |
| Ochratoxin A             | 0.010                   | 0.031                   | 0.025                         | 0.100                                   |
| Ochratoxin A (dog feed)  | 0.0014                  | 0.0043                  | 0.0040                        | -                                       |

**Table S4.** Proficiency tests

| Proficiency test                        | Matrix | Analyte          | Assigned value (mg/kg) | Submitted value (mg/kg) | z-score |
|-----------------------------------------|--------|------------------|------------------------|-------------------------|---------|
| Progetto Trieste – F1962 (October 2019) | Feed   | AFB <sub>1</sub> | 0.01207                | 0.01605                 | 1.18    |
| FAPAS 04430 (December 2021)             | Feed   | AFB <sub>1</sub> | 0.0191                 | 0.0223                  | 0.8     |
|                                         |        | ZEN              | 0.0126                 | 0.0110                  | -0.6    |
|                                         |        | OTA              | 0.0745                 | 0.0820                  | 0.5     |
| FAPAS 04447 (July 2022)                 | Feed   | AFB <sub>1</sub> | 0.0109                 | 0.0068                  | -1.7    |
|                                         |        | ZEN              | 0.116                  | 0.081                   | -1.4    |
|                                         |        | OTA              | 0.0100                 | 0.0102                  | 0.1     |
